# Supplementary material for: Time-Limited Therapy With Belatacept in Kidney Transplant Recipients
Source: Preprints.org preprint supplement (doi:10.20944/preprints202204.0060.v1), 2022-04-07

**Supplemental Figure 1. Tacrolimus trough level after belatacept discontinuation (n = 25)**

Each dot representing mean tacrolimus trough level at corresponding time point, and error bar standard deviation.


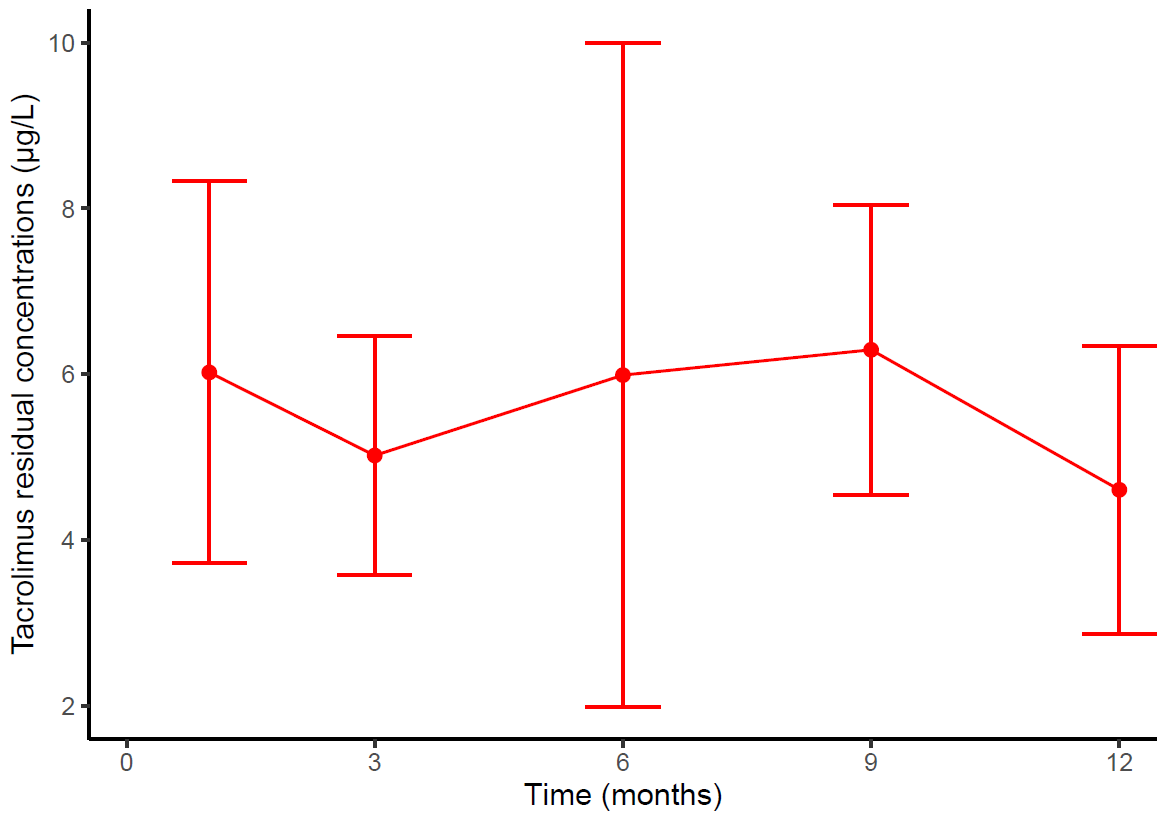


**Supplemental Figure 2. Gene Ontology enrichment analysis (biological process) of Differential Expressed Genes between Day 0 and 3-months post belatacept withdrawal.**


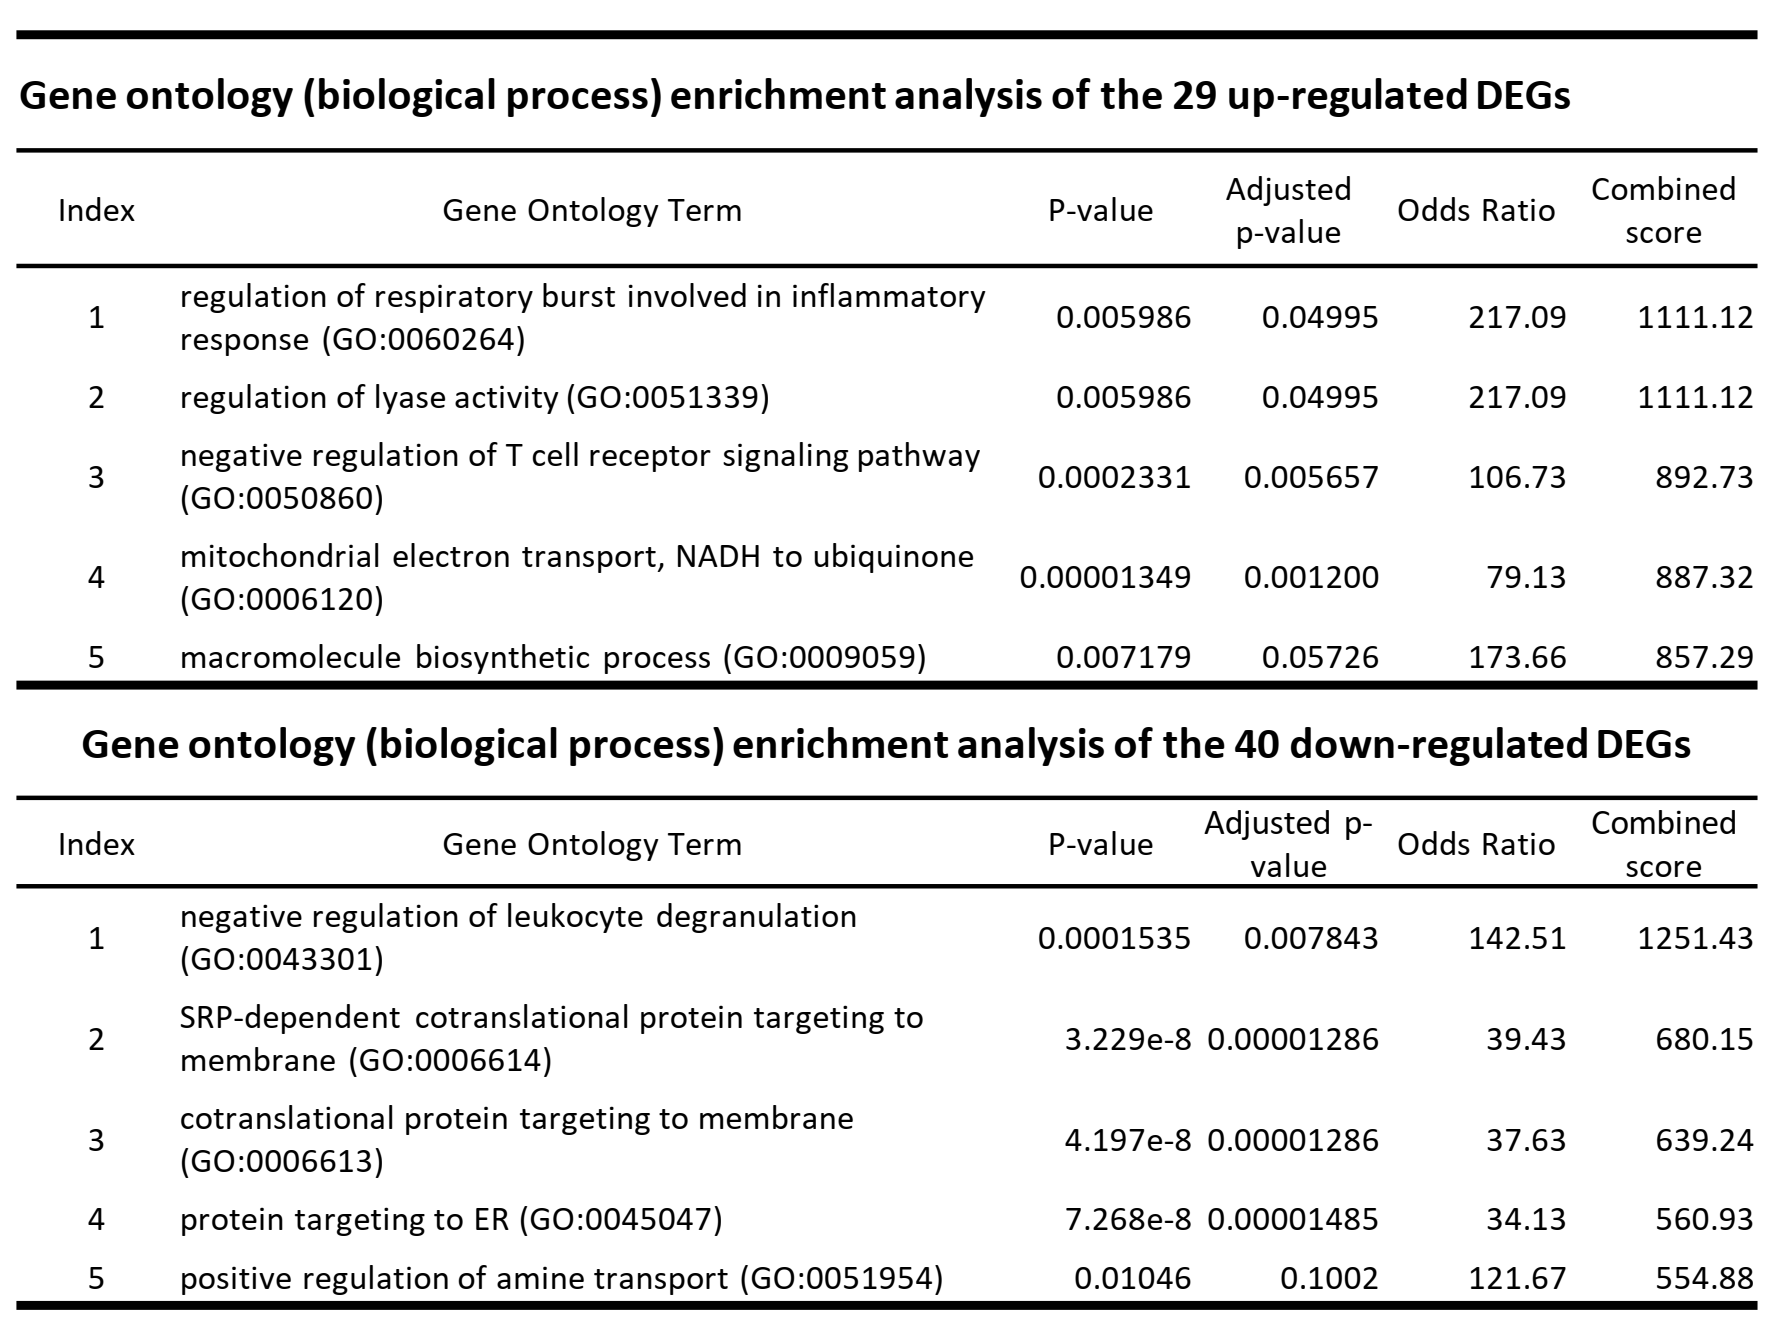

Supplement: Supplementary file 1 [file supplementary]
